# Supplementary material
Source: publisher site journal article supplement (https://www.kjim.org/upload/media/kjim-2021-028-suppl3.pdf)
Supplement: Supplementary file 1 [file kjim-2021-028-suppl3.pdf]

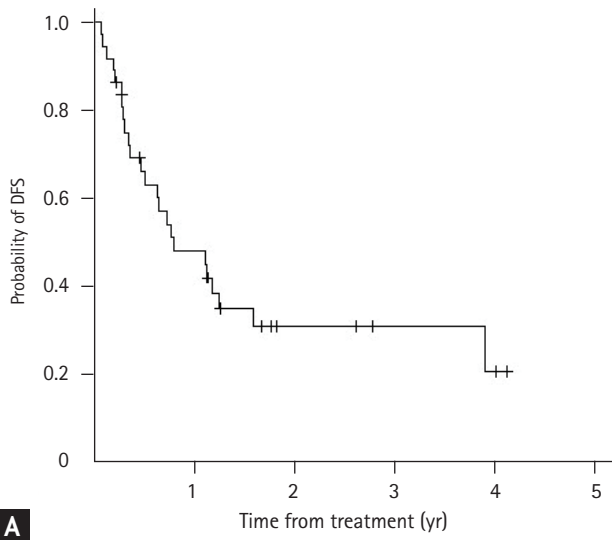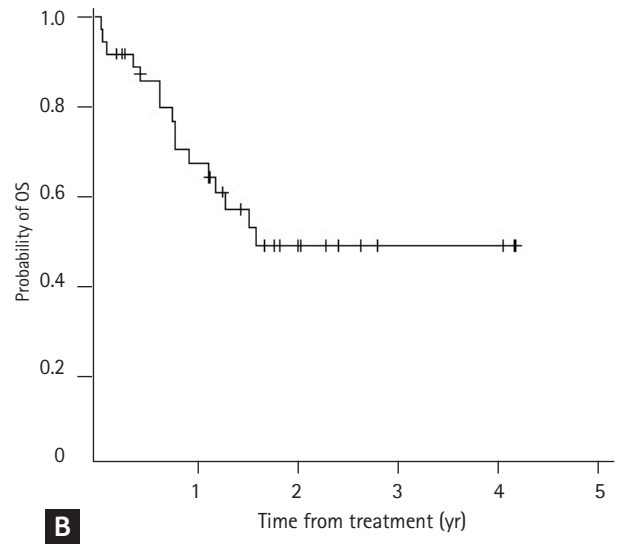

**Supplementary Figure 3.** (A) Disease-free survival (DFS) and (B) overall survival (OS) of the patients with Philadelphia positive acute lymphoblastic leukemia.
